# Supplementary material
Source: PubMed Central journal article supplement (PMC6589382)
Supplement: NIHMS1524101-supplement-2.pdf [file NIHMS1524101-supplement-2.pdf]

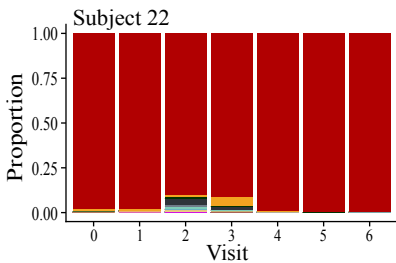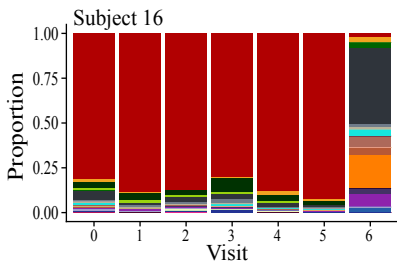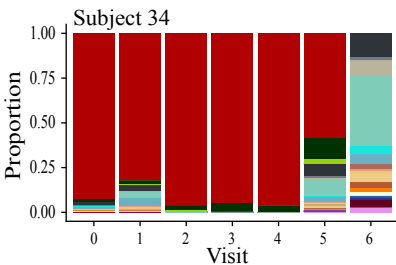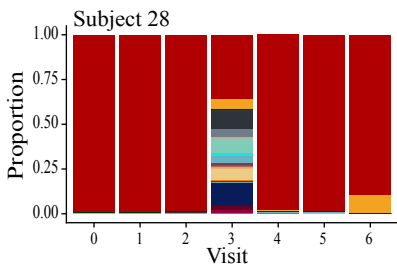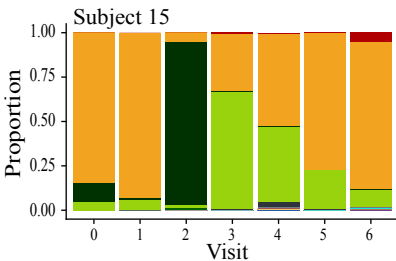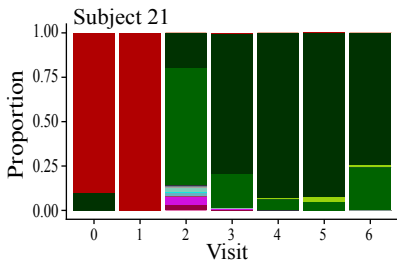

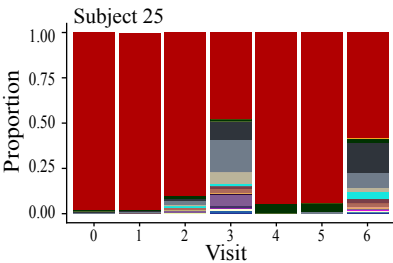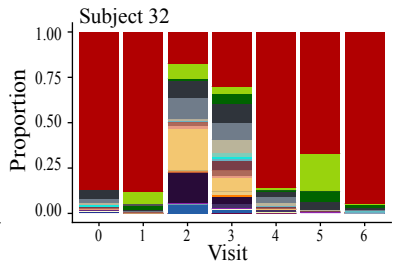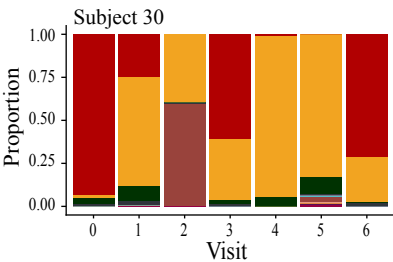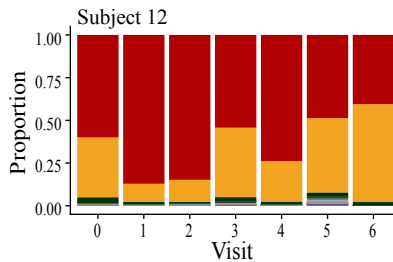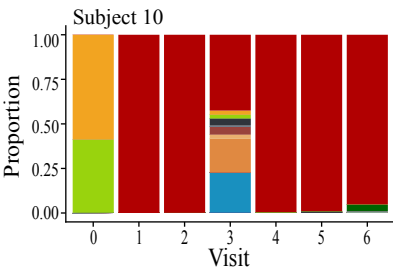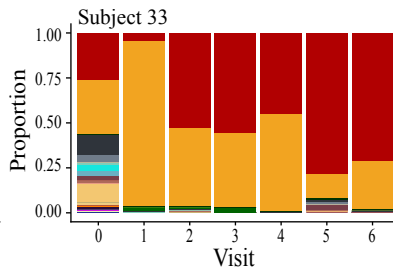

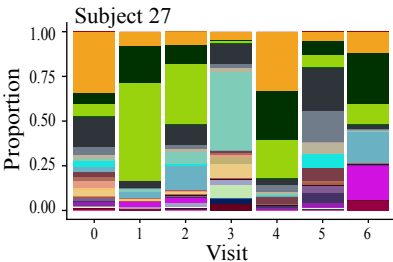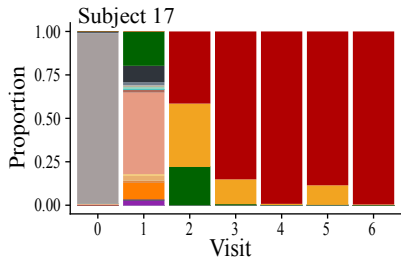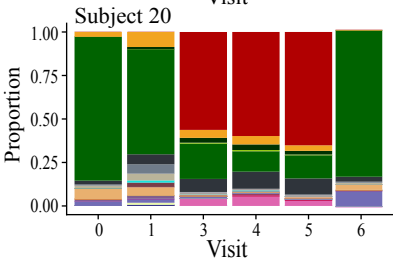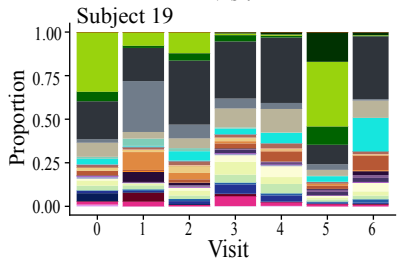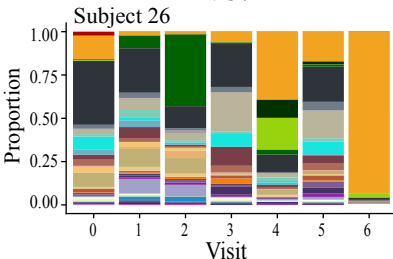

Taxa Key

- *Lactobacillus crispatus*
- *Lactobacillus iners*
- *Lactobacillus jensenii*

- *Lactobacillus gasseri*
- *Lactobacillus kalixensis*
- *Gardnerella vaginalis*
- Other
- *Finegoldia magna*
- *Atopobium vaginae*
- *Prevotella timonensis*
- *Corynebacterium amycolatum*
- *Peptoniphilus*
- *Corynebacterium*
- *Prevotella corporis*
- *Streptococcus agalactiae*
- *Peptoniphilus coxii*
- *Anaerococcus prevotii*
- *Corynebacterium pseudogenitalum*
- *Prevotella bivia*
- *Corynebacterium tuscaniense*
- *Corynebacterium aurimucosum*
- *Streptococcus anginosus*
- *Bacteroides coagulans*
- *Lactobacillus lactolyticus*
- *Anaerococcus octavius*
- *Anaerococcus tetradius*
- *Dialister microaerophilus*
- *Anaerococcus obesiensis*
- *Staphylococcus hominis*
- *Megasphaera micronuciformis*
- *Corynebacterium riegelii*
- *Dialister propioniciifaciens*
- *Mobiluncus curtisii*
- *Brevibacterium ravenstephensense*
- *Veillonella montpellierensis*
- *Peptoniphilus asaccharolyticus*
- *Varibaculum cambriense*
- *Corynebacterium jeikeium*
- *Corynebacterium imitans*
- *Staphylococcus*
- *Streptococcus oralis*
- *Arthrobacter cumminsi*
- *Propionibacterium acnes*
- *Saccharofermentans acetigenes*
- *Sneathia sanguinegens*
