# Supplementary material
Source: PubMed Central journal article supplement (PMC6589382)
Supplement: NIHMS1524101-supplement-6.pdf [file NIHMS1524101-supplement-6.pdf]

**Supplemental Table 2. Characteristics of study cohort**

|                                         | <b>Mean (SD)</b>              |
|-----------------------------------------|-------------------------------|
| Age                                     | 14.6 (0.3)                    |
| Age at menarche                         | 11.8 (1.3)                    |
| Vaginal pH                              | 5.2 (0.9)                     |
| Nugent Score                            | 1.3 (2.5)                     |
| Glycogen (µg/ml)                        | 324.7 (399.1)                 |
| Estradiol (pg/ml)                       | 7.3 (4.5)                     |
| PSS Score <sup>a</sup>                  | 18.5 (6.5)                    |
| BSI Score <sup>b</sup>                  | 0.5 (0.7)                     |
| PHQ Score <sup>c</sup>                  | 5.9 (4.8)                     |
|                                         | <b>Number of Subjects (%)</b> |
| <b>Hygiene:</b>                         |                               |
| Douche                                  | 0 (0.0)                       |
| <b>Birth Control:<sup>d</sup></b>       |                               |
| Pill                                    | 2 (9.5)                       |
| Patch                                   | 1 (4.8)                       |
| Ring                                    | 0 (0.0)                       |
| Depo Provera                            | 0 (0.0)                       |
| Intrauterine Device                     | 1 (4.8)                       |
| Implant (arm rod)                       | 2 (9.5)                       |
| Plan B - emergency contraceptive        | 0 (0.0)                       |
| None                                    | 16 (76.2)                     |
| <b>Sexual Activity:</b>                 |                               |
| Vaginal Sex                             | 6 (28.6)                      |
| Oral Sex                                |                               |
| Given                                   | 5 (23.8)                      |
| Received                                | 7 (33.3)                      |
| Anal Sex                                | 0 (0.0)                       |
| <b>Postive STI results:<sup>e</sup></b> |                               |
| Chlamydia                               | 1 (4.8)                       |
| Gonorrhoea                              | 1 (4.8)                       |
| Trichomonas                             | 1 (4.8)                       |

<sup>a</sup>PHQ (Personal Health Questionnaire - 9) is a self-report questionnaire consisting of 10 questions (9 asking about specific symptoms, and the final asking how impactful those symptoms are to assess the severity of depression).

<sup>b</sup>BSI (Brief Symptom Inventory) – the anxiety subscale used here – is a self-report questionnaire consisting of 6 questions designed to clinically assess the level of anxiety in individuals.

<sup>c</sup>PSS (Perceived Stress Scale) is a self-report questionnaire used to evaluate the degree to which particular situations in one's life are deemed stressful.

<sup>d</sup>In total, five subjects reported using birth control over the course of the study. One subject reported using both the patch and the implant.

<sup>e</sup>One subject tested positive for all three STIs listed at her baseline visit. There were no other positive STI results from that subject or any other subject throughout the duration of the study.
