# Supplementary material
Source: PubMed Central journal article supplement (PMC6589382)

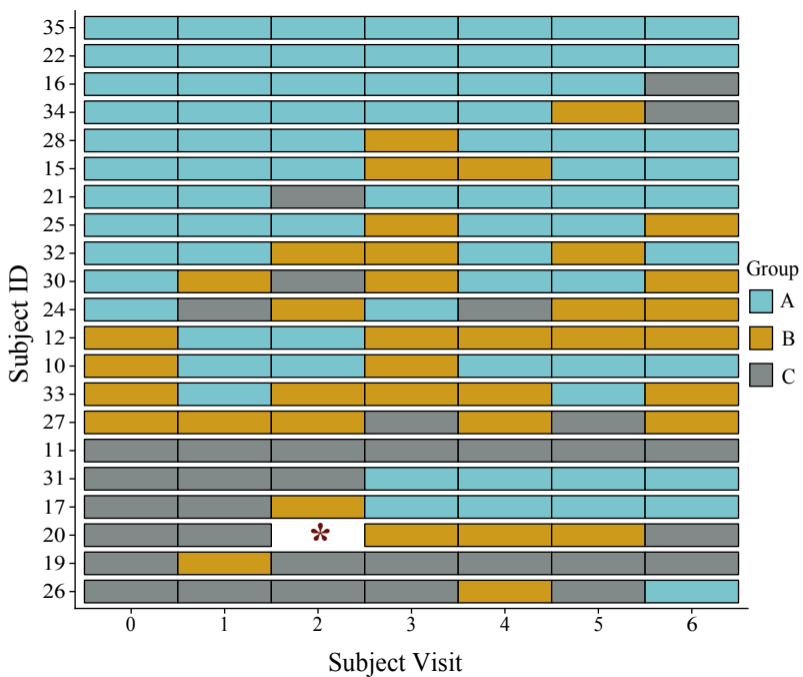

Supplement: NIHMS1524101-supplement-1.pdf [file NIHMS1524101-supplement-1.pdf]

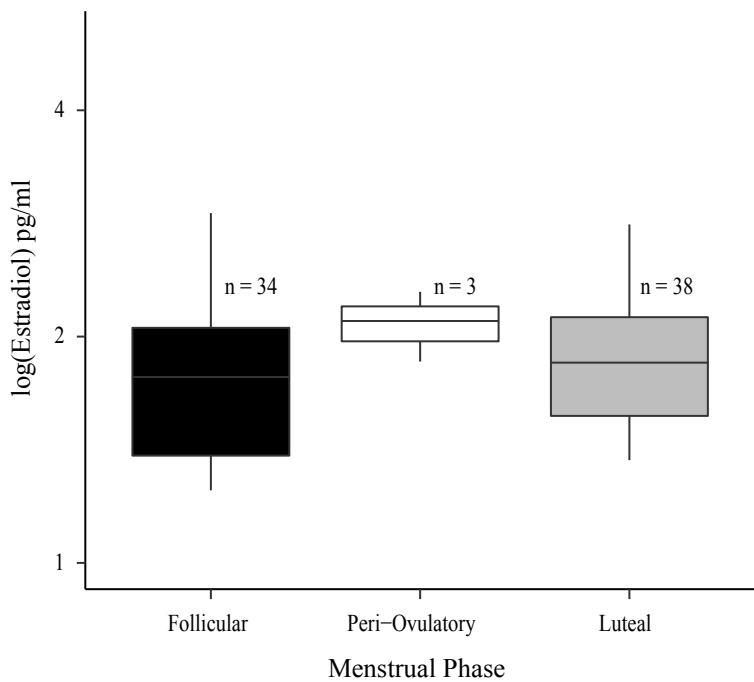

Supplement: NIHMS1524101-supplement-3.pdf [file NIHMS1524101-supplement-3.pdf]

**(A)**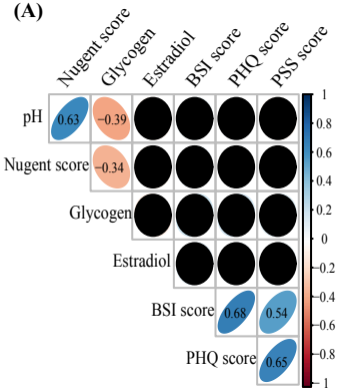**(B)**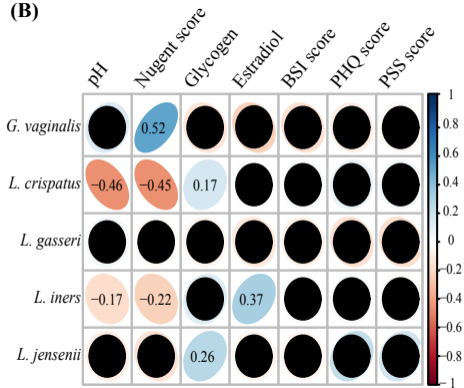

Supplement: NIHMS1524101-supplement-4.pdf [file NIHMS1524101-supplement-4.pdf]
